# Supplementary material for: Portable, low-cost samplers for distributed sampling of atmospheric gases
Source: Copernicus journal article supplement (doi:10.5194/amt-16-4681-2023), 2023-10-13
Supplement: Supplementary file 1 [file amt-16-4681-2023-supplement.zip]

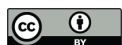

## *Supplement of*

# **Portable, low-cost samplers for distributed sampling of atmospheric gases**

**James F. Hurley et al.**

*Correspondence to:* Gabriel Isaacman-VanWertz (ivw@vt.edu)

- amt-16-4681-2023-supplement-title-page.pdf
- 20230923\_Hurley\_Publication\_SI\_.docx
- Hurley et al SI data 202310102.xlsx

The copyright of individual parts of the supplement might differ from the article licence.
