# Supplementary material for: Portable, low-cost samplers for distributed sampling of atmospheric gases
Source: Copernicus journal article supplement (doi:10.5194/amt-16-4681-2023), 2023-10-13
Supplement: Supplementary file 2 [file amt-16-4681-2023-supplement.zip]

Archive with 3 entries (3 files):
- Hurley et al SI data 202310102.xlsx
- 20230923_Hurley_Publication_SI_.docx
- amt-16-4681-2023-supplement-title-page.pdf
