# Supplementary material for: Portable, low-cost samplers for distributed sampling of atmospheric gases
Source: Copernicus journal article supplement (doi:10.5194/amt-16-4681-2023), 2023-10-13
Supplement: Supplementary file 2 [file amt-16-4681-2023-supplement.zip › Hurley et al SI data 202310102.xlsx]

## Sheet: 2.3.1_Reproducibility
Reproducibility tests. Data in Figure 2, Table S1																			Table S1
						Set A - Location: Bench					Set B - Location: Near window								Set A - Location: Bench			Set B - Location: Near window
						Box number (integrated values in arbitary units)
Number	Name	CAS#	RI	RT (sec)	Quant ion	1	2	3	4	6	7	8	9	10	11	12	13		Mean	SD	%RSD	Mean	SD	%RSD	%increase	p-Value
1	Benzene	71-43-2	662	195	78	108400000	105300000	99640000	104900000	95950000	100600000	107600000	100900000	87970000	103800000	86840000	86720000		102838000	4.97295e+06	0.0483571	9.63471e+07	8.89036e+06	0.0922743	0.0673695	0.173846
2	1-Butanol	71-36-3	669	203	56	402000000	388900000	395600000	400100000	329900000	251800000	260900000	261900000	214700000	252200000	250400000	247600000		383300000	3.02743e+07	0.0789834	248500000	1.58365e+07	0.0637282	0.542455	1.41967e-06
3	3-Methyl Hexane	589-34-4	673	213	71	11360000	10420000	10260000	10380000	9558000	9841000	10040000	9981000	9303000	9987000	10410000	9397000		10395600	642430	0.0617983	9.85129e+06	385166	0.0390981	0.0552531	0.0949538
4	Heptane	142-82-5	700	249	71	28560000	28060000	27750000	27540000	24330000	25710000	26080000	26770000	23210000	26120000	24530000	24280000		27248000	1.67576e+06	0.0615003	2.52429e+07	1.26414e+06	0.0500792	0.0794341	0.0390621
5	tert-Butyl acetate	540-88-5	701	255	101	15960000	15070000	14210000	14090000	14120000	14320000	12970000	13690000	12430000	13420000	14060000	13660000		14690000	817404	0.0556436	1.35071e+07	642851	0.0475934	0.0875727	0.0183368
6	Methyl isobutyl ketone (MIK)	108-10-1	733	306	58	4125000	4044000	4025000	3664000	3921000	3898000	3672000	3600000	3446000	3557000	3495000	3450000		3955800	178574	0.0451423	3.58829e+06	159226	0.0443738	0.102421	0.00376444
7	Propylene glycol	4254-14-2	758	311	45	30940000	32200000	28800000	29500000	25070000	22620000	24600000	22740000	21900000	24140000	25510000	25140000		29302000	2.70566e+06	0.0923372	2.38071e+07	1.3905e+06	0.0584068	0.230807	0.00092037
8	Toluene	108-88-3	771	343	91	850900000	857600000	869300000	855200000	731800000	818300000	854300000	863900000	712500000	805300000	782300000	788800000		832960000	5.69595e+07	0.068382	8.03629e+08	5.06582e+07	0.0630368	0.0364987	0.369177
9	Octane	11-65-9	800	386	85	16890000	16350000	15240000	14990000	15910000	14170000	13740000	13910000	15590000	14880000	14050000	13180000		15876000	781588	0.0492308	1.42171e+07	790774	0.0556212	0.11668	0.00485372
10	Tetrachloroethylene	127-18-4	815	393	166	21960000	22730000	22310000	21300000	19680000	24930000	24800000	25080000	21070000	23510000	22230000	22180000		21596000	1.19236e+06	0.0552122	23400000	1.60321e+06	0.068513	-0.077094	0.0599668
11	Butyl acetate	123-86-4	812	401	56	25360000	24840000	22740000	22000000	22840000	22140000	20810000	21420000	21760000	20760000	20360000	20050000		23556000	1.45797e+06	0.0618938	2.10429e+07	757908	0.0360173	0.11943	0.00283693
12	Furfural	98-01-1	835	421	95	16030000	16340000	15410000	14850000	14470000	13910000	12760000	13280000	13710000	13160000	13320000	12960000		15420000	781985	0.0507124	13300000	401622	0.0301971	0.159398	0.000101893
13	Chlorobenzene	108-90-7	840	439	112	11010000	10680000	9893000	9437000	10090000	9489000	9111000	9305000	9457000	9308000	9140000	8731000		10222000	627016	0.0613399	9.22014e+06	258489	0.0280353	0.10866	0.00320433
14	Maleic anhydride	108-31-6	827	442	54	82360000	81430000	75040000	71050000	78010000	73780000	68970000	70530000	72490000	73230000	69770000	64710000		77578000	4.6623e+06	0.0600983	7.04971e+07	3.12437e+06	0.0443191	0.100442	0.00998629
15	Ethylbenzene	100-41-4	855	455	91	140200000	126200000	111300000	107100000	114900000	107600000	100800000	102700000	111000000	111200000	109800000	105300000		119940000	1.33657e+07	0.111437	1.06914e+08	4.11519e+06	0.0384905	0.121833	0.0335406
16	p,m-Xylene	106-42-3	860	465	91	337500000	309200000	276700000	260800000	281500000	262900000	248400000	258600000	280600000	276300000	277700000	260900000		293140000	3.03207e+07	0.103434	2.66486e+08	1.19347e+07	0.0447857	0.100021	0.058203
17	Phenylethyne	536-74-3	877	471	102	29600000	29780000	29110000	27490000	28140000	26430000	26710000	26130000	28320000	26250000	25290000	23050000		28824000	980474	0.0340159	2.60257e+07	1.59962e+06	0.0614632	0.10752	0.00623552
18	o-Xylene	95-47-6	891	488	91	148300000	126100000	106700000	101900000	110600000	103300000	96760000	102300000	112200000	113000000	110700000	104900000		118720000	1.88598e+07	0.158859	1.06166e+08	6.01256e+06	0.0566337	0.118252	0.124995
19	Nonane	111-84-2	900	494	85	9850000	9304000	8513000	8298000	8827000	7938000	7999000	8062000	9172000	8728000	8112000	7723000		8958400	625733	0.0698487	8.24771e+06	511695	0.0620409	0.0861676	0.0554531
20	2-Butoxyethanol (2BE)	111-76-2	907	497	87	2494000	2901000	3030000	3733000	3193000	4696000	3508000	3062000	3055000	3005000	3222000	2266000		3070200	451839	0.147169	3.25914e+06	737036	0.226144	-0.0579732	0.624212
21	Butyrolactone	96-48-0	915	501	86	2738000	2635000	2504000	2309000	2453000	2260000	2196000	2227000	2249000	2251000	2274000	2127000		2527800	165613	0.0655167	2.22629e+06	50523	0.0226938	0.135434	0.000972313
22	alpha-Pinene	80-56-8	940	529	93	37830000	35620000	34510000	36120000	31430000	27500000	29790000	31140000	29940000	31570000	30680000	29710000		35102000	2.37596e+06	0.0676872	3.00471e+07	1.32873e+06	0.0442215	0.168231	0.000792421
23	1,2,4-Trimethylbenzene (TMB)	95-63-6	987	581	105	80100000	78900000	72810000	69400000	74280000	70180000	66030000	66100000	69750000	68340000	68410000	62670000		75098000	4.41153e+06	0.0587437	6.73543e+07	2.61661e+06	0.0388484	0.11497	0.00329241
24	2-Ethylhexanol (2EH)	104-76-7	1029	604	83	31000000	18230000	16830000	19700000	16930000	12970000	13860000	16550000	25040000	21430000	21490000	22090000		20538000	5.96342e+06	0.29036	1.90614e+07	4.59876e+06	0.24126	0.0774638	0.637386
25	Limonene	138-86-3	1031	610	68	1340000	1226000	1139000	1178000	1055000	1095000	1045000	1227000	1017000	1272000	942200	963500		1187600	105756	0.0890501	1.08024e+06	126789	0.117371	0.0993824	0.153855
26	o-Cymene	527-84-4	1020	652	119	15410000	14970000	13960000	13130000	13930000	12860000	12260000	12340000	13140000	12600000	12780000	11330000		14280000	908350	0.06361	1.24729e+07	588011	0.0471433	0.144886	0.00180084
27	Undecane	1120-21-4	1100	659	156	1033000	1089000	969000	912700	1008000	983600	942300	951100	1023000	957500	886700	870300		1002340	66387	0.066232	944929	52842	0.0559217	0.0607574	0.125445
28	Dodecane	112-40-3	1200	728	57	305000000	185900000	147500000	186500000	215800000	206700000	306400000	320600000	455400000	323500000	301900000	268800000		208140000	5.9331e+07	0.285053	311900000	7.51192e+07	0.240844	-0.332671	0.0284038
29	1-Phenoxy-2-Propanol (1P2P)	770-35-4	1246	763	94	370800000	385100000	368500000	338800000	334200000	582700000	525600000	545000000	567100000	582700000	614200000	575900000		359480000	2.19808e+07	0.0611462	5.70457e+08	2.86192e+07	0.0501688	-0.369839	7.93353e-08
30	Tridecane	629-50-5	1300	792	57	65650000	61240000	55160000	55070000	59010000	107500000	96050000	101000000	106800000	102100000	102100000	92040000		59226000	4.44903e+06	0.0751195	1.01084e+08	5.52335e+06	0.054641	-0.414093	6.95899e-08
31	Phthalic anhydride (PhAn)	85-44-9	1313	810	104	63340000	62050000	58560000	59060000	57370000	55650000	54740000	53970000	51430000	54940000	52270000	49980000		60076000	2.51015e+06	0.0417828	5.32829e+07	2.09415e+06	0.0393025	0.127492	0.000456351

## Sheet: 2.3.2_OzoneRemoval
Ozone removal tests. Data in Figure 3, Table S3							OUTDOOR DATASET											Table S3
							With ozone scrubber					Without ozone scrubber						With ozone scrubber			Without ozone scrubber
							Box number (integrated values in arbitary units)
Number	Name	CAS#	RI	RT (sec)	Quant ion	Ozone rate coefficient (kO3)	1	4	6	11	13	7	8	9	10	12		Mean	SD	%RSD	Mean	SD	%RSD	Ratio	p-Value
1	Benzene	71-43-2	662	200	78	7e-23	187400000	145300000	180300000	147500000	126900000	116300000	207300000	210200000	222900000	125200000		157480000	2.54904e+07	0.161865	176380000	5.12175e+07	0.290382	1.12002	0.481191
2	Toluene	108-88-3	771	350	91	1.5e-22	2529000000	2464000000	2534000000	2382000000	2430000000	2612000000	2258000000	2743000000	2493000000	2504000000		2467800000	6.5063e+07	0.0263648	2522000000	1.78747e+08	0.0708751	1.02196	0.54184
3	Ethylbenzene	100-41-4	855	460	91	1.7e-22	66930000	57760000	63220000	61210000	63020000	65350000	53080000	69710000	57270000	60350000		62428000	3.33615e+06	0.0534399	61152000	6.55234e+06	0.107148	0.97956	0.708102
4	p,m-Xylene	106-42-3	877	471	91	5e-22	186100000	161300000	175000000	164900000	169800000	177000000	147000000	190100000	156700000	164300000		171420000	9.69366e+06	0.0565492	167020000	1.69336e+07	0.101387	0.974332	0.627683
6	o-Xylene	95-47-6	894	493	91	7e-22	63610000	54830000	59930000	52420000	57270000	57220000	48610000	59790000	50210000	51180000		57612000	4.36356e+06	0.0757404	53402000	4.83407e+06	0.0905223	0.926925	0.186307
7	α-Pinene	80-56-8	940	534	93	1.07e-16	52200000	46820000	48840000	45840000	48300000	16690000	15440000	15020000	9028000	13460000		48400000	2.4338e+06	0.0502852	13927600	2.97222e+06	0.213405	0.28776	3.97052e-08
8	Camphene	79-92-5	953	550	93	4.5e-19	3446000	3124000	3053000	3204000	3082000	2469000	2282000	2455000	1758000	2252000		3181800	158260	0.0497391	2243200	288464	0.128595	0.70501	0.000213928
9	Sulcatone	110-93-0	986	573	108	2.6e-16	10210000	13740000	13260000	10410000	12440000	724700	861500	631700	334500	914000		12012000	1.62329e+06	0.135139	693280	229411	0.330907	0.0577156	3.08212e-07
10	β-Pinene	127-91-3	980	575	136	2.35e-17	1448000	935600	1120000	1030000	1224000	391800	386700	411800	264400	388900		1151520	197190	0.171243	368720	59164.5	0.160459	0.320203	2.81e-05
11	3-Carene	13466-78-9	1004	599	93	3.7e-17	4463000	3554000	4293000	3879000	3589000	861300	677900	795500	523700	804000		3955600	410134	0.103684	732480	134396	0.183481	0.185175	1.67296e-07
12	Limonene	138-86-3	1033	613	68	2.5e-16	154300000	59820000	101100000	50650000	58070000	3690000	2330000	4717000	2072000	2394000		84788000	4.35909e+07	0.514116	3040600	1.12841e+06	0.371115	0.0358612	0.00302959
							INDOOR DATASET
							With ozone scrubber					Without ozone scrubber						With ozone scrubber			Without ozone scrubber
							Box number (integrated values in arbitary units)
Number	Name	CAS#	RI	RT (sec)	Quant ion	Ozone rate coefficient (kO3)	1	4	6	11	13	7	8	9	10	12		Mean	SD	%RSD	Mean	SD	%RSD	Ratio	p-Value
1	Benzene	71-43-2	662	200	78	7e-23	244900000	209000000	141400000	109600000	197000000	150500000	102300000	113100000	171700000	103000000		180380000	5.42849e+07	0.300948	128120000	3.13184e+07	0.244446	0.710278	0.099227
2	Toluene	108-88-3	771	350	91	1.5e-22	1858000000	2045000000	2074000000	1843000000	1813000000	2039000000	1971000000	2029000000	1928000000	1994000000		1926600000	1.22826e+08	0.0637529	1992200000	4.50522e+07	0.0226143	1.03405	0.294723
3	Ethylbenzene	100-41-4	855	460	91	1.7e-22	133400000	150800000	150300000	124500000	123900000	153400000	138900000	157800000	126800000	135700000		136580000	1.32973e+07	0.0973587	142520000	1.28315e+07	0.0900329	1.04349	0.492731
4	p,m-Xylene	106-42-3	877	471	91	5e-22	404700000	469000000	448000000	380700000	369100000	466200000	418000000	492000000	388400000	410500000		414300000	4.29882e+07	0.103761	435020000	4.2671e+07	0.0980897	1.05001	0.466285
6	o-Xylene	95-47-6	894	493	91	7e-22	127300000	152200000	149200000	112100000	117900000	149100000	135500000	149900000	121200000	127500000		131740000	1.8169e+07	0.137916	136640000	1.27898e+07	0.0936019	1.03719	0.635177
7	α-Pinene	80-56-8	940	534	93	1.07e-16	381400000	415700000	417200000	363000000	355100000	365800000	363600000	362700000	361900000	345600000		386480000	2.89799e+07	0.0749843	359920000	8.13677e+06	0.0226072	0.931277	0.0839464
8	Camphene	79-92-5	953	550	93	4.5e-19	37710000	40290000	44050000	34780000	34100000	48270000	42130000	47040000	44220000	43950000		38186000	4.10293e+06	0.107446	45122000	2.48636e+06	0.055103	1.18164	0.0120064
10	β-Pinene	127-91-3	980	575	136	2.35e-17	21070000	19720000	26110000	15720000	15190000	15570000	14770000	16720000	12640000	12320000		19562000	4.44552e+06	0.227253	14404000	1.89157e+06	0.131322	0.736326	0.0440401
11	3-Carene	13466-78-9	1004	599	93	3.7e-17	18940000	20190000	21400000	17600000	17760000	13610000	14180000	14290000	13680000	11870000		19178000	1.62164e+06	0.0845574	13526000	972692	0.0719128	0.705287	0.000155344
12	Limonene	138-86-3	1033	613	68	2.5e-16	39100000	38550000	39510000	30450000	29940000	18590000	17630000	20810000	17950000	14830000		35510000	4.86719e+06	0.137065	17962000	2.14623e+06	0.119487	0.505829	7.79291e-05

## Sheet: 2.4.1_TempVariability
Temporal variability tests. Data in Figure 4, Table S4
							Start	End	Length (min)
RAW DATA						Time:	15:46:00	10:36:00	1130		13:42:00	14:52:00	1510		16:55:00	12:49:00	1194		13:26:00	12:15:00	1369		12:21:00	12:53:00	1472		13:04:00	12:04:00	1380		14:26:00	12:37:00	1331		12:43:00	12:45:00	1442		12:51:00	12:47:00	1436
						2023-03-23				2023-03-24				2023-03-25				2023-03-30				2023-03-31				2023-04-01				2023-04-05				2023-04-06				2023-04-08
Number	Name	CAS#	RI	RT (sec)	Quant ion	Blank	Sample	Sample	Sample	Blank	Sample	Sample	Sample	Blank	Sample	Sample	Sample	Blank	Sample	Sample	Sample	Blank	Sample	Sample	Sample	Blank	Sample	Sample	Sample	Blank	Sample	Sample	Sample	Blank	Sample	Sample	Sample	Blank	Sample	Sample	Sample
1	Benzene	71-43-2	195	662	78	23780000	44330000	43990000	41360000	17740000	41400000	34820000	36800000	19520000	36220000	37100000	33160000	28800000	53390000	63600000	58140000	18300000	42610000	44350000	41020000	23870000	53410000	46380000	46650000	21110000	49460000	50480000	48920000	28200000	49450000	41830000	44590000	23390000	53140000	45700000	44580000
2	Toluene	108-88-3	346	771	91	5878000	187600000	173400000	149000000	7541000	117300000	90110000	95890000	5077000	106500000	101400000	92790000	15120000	387400000	409600000	406600000	6880000	112800000	110300000	113300000	5722000	241200000	211100000	200300000	4417000	707800000	692000000	683500000	4381000	296900000	262600000	258600000	5009000	172000000	143400000	137400000
3	Ethylbenzene	100-41-4	458	855	91	1195000	110300000	94940000	87860000	1289000	106800000	101700000	96550000	1090000	56810000	58740000	58440000	1625000	98620000	97850000	95990000	2019000	59450000	56340000	61420000	1083000	166400000	147100000	139700000	788300	107500000	121500000	114800000	720300	184100000	188100000	194700000	952100	214800000	212800000	198000000
4	p,m-Xylene	106-42-3	877	471	91	2419000	222500000	199700000	182600000	2233000	248800000	243700000	225000000	2109000	99560000	101900000	102300000	3347000	235900000	249300000	234600000	3890000	103400000	95370000	100600000	2042000	227200000	225300000	205700000	1658000	215800000	250600000	238800000	1532000	277400000	308000000	312200000	1688000	295800000	317900000	293400000
5	o-Xylene	95-47-6	491	894	91	1161000	94360000	79600000	72040000	1053000	106400000	99460000	91210000	984300	46010000	46530000	45710000	1392000	86900000	88660000	81870000	1342000	45040000	40930000	42540000	1109000	94750000	89660000	85120000	815100	87640000	100500000	96640000	767500	111400000	122600000	127000000	886500	125800000	135400000	124000000
6	Trichloroethylene	79-01-6	250	701	130	397000	104600000	91920000	74590000	423700	81560000	59220000	66870000	382500	108900000	73180000	48600000	361900	61050000	62990000	58980000	296900	38030000	29850000	34050000	402500	109800000	63910000	44680000	409100	66790000	46650000	55660000	530300	93670000	76340000	77680000	557300	144700000	102400000	91640000
7	Tetrachloroethylene	127-18-4	394	815	166	37140	1813000	1529000	1234000	34190	1322000	1019000	1172000	36960	1894000	1776000	1880000	56050	2650000	2517000	2485000	40130	1765000	1710000	1754000	56660	8874000	7697000	7217000	30770	3786000	3169000	3363000	48650	8752000	7883000	8335000	57390	3669000	3089000	2704000
8	Furfural	98-01-1	422	835	95	307900	76200000	72860000	66860000	404300	129600000	113900000	112900000	333700	61830000	65910000	67350000	570800	20130000	22900000	21200000	346600	57850000	61580000	65700000	448900	173100000	170600000	157000000	302500	53970000	62630000	59320000	479400	129800000	150000000	136600000	666800	177000000	179900000	165300000
9	alpha-Pinene	80-56-8	529	940	93	3573000	48310000	41390000	38500000	3822000	44330000	36190000	38700000	3112000	127300000	128700000	129900000	1858000	35280000	30440000	30180000	1764000	44170000	37710000	43000000	3527000	56550000	46010000	44740000	2909000	56020000	50490000	47080000	3109000	59890000	51960000	50320000	3316000	52240000	42670000	40500000
10	Sulcatone	110-93-0	570	986	108	96330	1584000	1413000	1553000	142900	13110000	13800000	12720000	114400	3584000	3507000	4781000	55520	313400	311800	288800	86780	1903000	1973000	2125000	144000	6475000	6830000	6932000	145300	1871000	1811000	1937000	250200	4002000	3340000	4794000	188600	11240000	13450000	10380000
11	beta-Pinene	127-91-3	571	980	136	0	818400	861300	859700	0	1169000	1071000	1088000	0	737300	670200	706100	0	528200	510200	467400	0	1593000	1537000	1613000	0	1444000	1193000	1182000	0	1312000	1189000	1100000	0	1739000	1437000	1536000	0	1407000	1155000	1123000
12	3-Carene	13466-78-9	597	1009	93	0	49150000	49220000	47680000	0	86840000	77140000	76700000	0	88950000	98370000	102600000	0	7813000	7751000	6199000	0	24320000	25190000	28080000	0	82450000	84650000	78930000	0	33190000	34970000	34490000	0	84380000	96570000	108200000	0	125400000	108500000	104400000
13	Limonene	138-86-3	613	1031	136	32750	1463000	1664000	1581000	40190	5394000	6721000	6229000	0	0	0	0	71550	674700	730000	725200	78910	2476000	2558000	2496000	55110	9353000	9880000	9215000	48330	1895000	2228000	2118000	78160	11320000	12690000	14670000	55980	13800000	16550000	15560000
BLANK AND FLOW CORRECTED
						2023-03-23				2023-03-24				2023-03-25				2023-03-30				2023-03-31				2023-04-01				2023-04-05				2023-04-06				2023-04-08
Number	Name	CAS#	RI	RT (sec)	Quant ion	Blank	Sample	Sample	Sample	Blank	Sample	Sample	Sample	Blank	Sample	Sample	Sample	Blank	Sample	Sample	Sample	Blank	Sample	Sample	Sample	Blank	Sample	Sample	Sample	Blank	Sample	Sample	Sample	Blank	Sample	Sample	Sample	Blank	Sample	Sample	Sample
1	Benzene	71-43-2	195	662	78	0	2.61876e+07	2.57543e+07	2.24028e+07	0	2.25632e+07	1.62882e+07	1.81764e+07	0	2.01407e+07	2.1202e+07	1.64503e+07	0	2.58653e+07	3.66048e+07	3.08617e+07	0	2.37815e+07	2.54837e+07	2.22261e+07	0	3.08243e+07	2.34887e+07	2.37704e+07	0	3.06717e+07	3.17752e+07	3.00875e+07	0	2.12205e+07	1.36111e+07	1.63673e+07	0	2.98329e+07	2.23721e+07	2.1249e+07
2	Toluene	108-88-3	346	771	91	0	2.31575e+08	2.13479e+08	1.82386e+08	0	1.04671e+08	7.87413e+07	8.42534e+07	0	1.22319e+08	1.16168e+08	1.05785e+08	0	3.91587e+08	4.14939e+08	4.11783e+08	0	1.03617e+08	1.01172e+08	1.04107e+08	0	2.45716e+08	2.14307e+08	2.03038e+08	0	7.60985e+08	7.43891e+08	7.34695e+08	0	2.92113e+08	2.57861e+08	2.53866e+08	0	1.67456e+08	1.38776e+08	1.3276e+08
3	Ethylbenzene	100-41-4	458	855	91	0	1.39036e+08	1.19463e+08	1.1044e+08	0	1.0062e+08	9.57562e+07	9.08449e+07	0	67200000	6.95276e+07	6.91658e+07	0	1.02025e+08	1.01215e+08	9.9259e+07	0	56182500	5.31401e+07	5.81097e+07	0	1.72505e+08	1.52366e+08	1.44644e+08	0	1.15451e+08	1.30597e+08	1.23348e+08	0	1.83125e+08	1.8712e+08	1.93711e+08	0	2.14444e+08	2.12438e+08	1.97597e+08
4	p,m-Xylene	106-42-3	877	471	91	0	2.80457e+08	2.51402e+08	2.29611e+08	0	2.35137e+08	2.30273e+08	2.1244e+08	0	1.17529e+08	1.20351e+08	1.20833e+08	0	2.44614e+08	2.58709e+08	2.43246e+08	0	9.73467e+07	8.94913e+07	9.46076e+07	0	2.34947e+08	2.32965e+08	2.12513e+08	0	2.31679e+08	2.69329e+08	2.56562e+08	0	2.75485e+08	3.06043e+08	3.10237e+08	0	2.94931e+08	3.17093e+08	2.92525e+08
5	o-Xylene	95-47-6	491	894	91	0	1.18767e+08	9.99577e+07	9.03237e+07	0	1.00463e+08	9.38451e+07	8.59775e+07	0	5.43024e+07	5.49295e+07	5.39405e+07	0	8.99427e+07	9.1794e+07	8.46518e+07	0	4.2748e+07	3.87274e+07	4.03024e+07	0	9.77123e+07	9.2401e+07	8.76637e+07	0	9.39353e+07	1.07848e+08	1.03672e+08	0	1.10479e+08	1.21664e+08	1.26057e+08	0	1.25261e+08	1.34888e+08	1.23456e+08
6	Trichloroethylene	79-01-6	250	701	130	0	1.3279e+08	1.16631e+08	9.45468e+07	0	7.7375e+07	5.60706e+07	6.3366e+07	0	1.30875e+08	8.7796e+07	5.81518e+07	0	6.38355e+07	6.58762e+07	6.16582e+07	0	3.69128e+07	2.89106e+07	3.30193e+07	0	1.14154e+08	6.62687e+07	4.62026e+07	0	7.18171e+07	5.00277e+07	5.97756e+07	0	9.30105e+07	7.57046e+07	7.70427e+07	0	1.44544e+08	1.02126e+08	9.13364e+07
7	Tetrachloroethylene	127-18-4	394	815	166	0	2.26304e+06	1.90113e+06	1.5252e+06	0	1.22811e+06	939157	1.08506e+06	0	2.23965e+06	2.09733e+06	2.22276e+06	0	2.72848e+06	2.58858e+06	2.55492e+06	0	1.68737e+06	1.63357e+06	1.67661e+06	0	9.2007e+06	7.97253e+06	7.47166e+06	0	4.06276e+06	3.39523e+06	3.60512e+06	0	8.69128e+06	7.82348e+06	8.27486e+06	0	3.62167e+06	3.04005e+06	2.65398e+06
8	Furfural	98-01-1	422	835	95	0	9.67121e+07	9.24558e+07	8.48098e+07	0	1.23206e+08	1.08234e+08	1.07281e+08	0	7.41664e+07	7.9087e+07	8.08237e+07	0	2.05736e+07	2.34873e+07	2.16991e+07	0	5.62533e+07	5.99022e+07	6.39327e+07	0	1.80158e+08	1.77549e+08	1.63358e+08	0	5.80625e+07	6.74317e+07	6.38506e+07	0	1.29141e+08	1.49313e+08	1.35932e+08	0	1.76824e+08	1.79732e+08	1.65092e+08
9	alpha-Pinene	80-56-8	529	940	93	0	5.701e+07	4.81916e+07	4.45087e+07	0	3.86301e+07	3.08675e+07	3.32611e+07	0	1.49774e+08	1.51463e+08	1.5291e+08	0	3.51554e+07	3.00643e+07	2.97909e+07	0	4.14841e+07	3.51646e+07	4.03396e+07	0	5.53283e+07	4.43301e+07	4.30049e+07	0	5.74604e+07	5.14776e+07	4.77883e+07	0	5.67022e+07	4.87832e+07	4.71455e+07	0	4.90603e+07	3.94636e+07	3.72876e+07
10	Sulcatone	110-93-0	570	986	108	0	1.89579e+06	1.67788e+06	1.85629e+06	0	1.2366e+07	1.3024e+07	1.19941e+07	0	4.18444e+06	4.09158e+06	5.62806e+06	0	271254	269571	245379	0	1.77674e+06	1.84522e+06	1.99391e+06	0	6.60626e+06	6.9767e+06	7.08313e+06	0	1.86702e+06	1.80211e+06	1.93843e+06	0	3.7466e+06	3.08551e+06	4.5375e+06	0	1.10822e+07	1.32983e+07	1.02198e+07
11	beta-Pinene	127-91-3	571	980	136	0	1.04292e+06	1.09759e+06	1.09555e+06	0	1.11481e+06	1.02135e+06	1.03756e+06	0	889206	808281	851578	0	555594	536660	491641	0	1.55837e+06	1.50359e+06	1.57793e+06	0	1.50678e+06	1.24487e+06	1.23339e+06	0	1.41944e+06	1.28637e+06	1.19008e+06	0	1.73659e+06	1.43501e+06	1.53387e+06	0	1.41092e+06	1.15822e+06	1.12613e+06
12	3-Carene	13466-78-9	597	1009	93	0	6.26336e+07	6.27228e+07	6.07604e+07	0	8.28143e+07	7.3564e+07	7.31444e+07	0	1.07276e+08	1.18637e+08	1.23739e+08	0	8.2182e+06	8.15299e+06	6.5205e+06	0	2.37913e+07	2.46424e+07	2.74696e+07	0	8.60348e+07	8.83304e+07	8.23617e+07	0	3.5908e+07	3.78338e+07	3.73145e+07	0	8.4263e+07	9.64361e+07	1.0805e+08	0	1.25749e+08	1.08802e+08	1.04691e+08
13	Limonene	138-86-3	613	1031	136	0	1.82262e+06	2.07876e+06	1.97299e+06	0	5.10562e+06	6.3711e+06	5.90191e+06					0	634431	692599	687550	0	2.34498e+06	2.4252e+06	2.36454e+06	0	9.70215e+06	1.02521e+07	9.55815e+06	0	1.9979e+06	2.35817e+06	2.23916e+06	0	1.12262e+07	1.25943e+07	1.45716e+07	0	1.37823e+07	1.654e+07	1.55472e+07
DAILY SUMMARY
						2023-03-23				2023-03-24				2023-03-25				2023-03-30				2023-03-31				2023-04-01				2023-04-05				2023-04-06				2023-04-08					Table S4
Number	Name	CAS#	RI	RT (sec)	Quant ion	Mean	SD	%RSD		Mean	SD	%RSD		Mean	SD	%RSD		Mean	SD	%RSD		Mean	SD	%RSD		Mean	SD	%RSD		Mean	SD	%RSD		Mean	SD	%RSD		Mean	SD	%RSD			Mean Daily %RSD	Aggregate %RSD
1	Benzene	71-43-2	195	662	78	2.47816e+07	2.07143e+06	0.0835873		1.90093e+07	3.21932e+06	0.169355		1.92643e+07	2.49416e+06	0.12947		3.11106e+07	5.37409e+06	0.172741		2.38304e+07	1.62936e+06	0.0683729		2.60278e+07	4.1563e+06	0.159687		3.08448e+07	857089	0.0277872		1.70663e+07	3.85258e+06	0.225742		2.44847e+07	4.66559e+06	0.190551			0.136366	0.206777
2	Toluene	108-88-3	346	771	91	2.09147e+08	2.48793e+07	0.118956		8.92218e+07	1.36601e+07	0.153103		1.14757e+08	8.35716e+06	0.0728246		4.06103e+08	1.26696e+07	0.031198		1.02965e+08	1.57233e+06	0.0152705		2.21021e+08	2.21169e+07	0.100067		7.46524e+08	1.33413e+07	0.0178712		2.67947e+08	2.10238e+07	0.0784627		1.46331e+08	1.85408e+07	0.126705			0.0793842	0.816949
3	Ethylbenzene	100-41-4	458	855	91	1.2298e+08	1.46189e+07	0.118872		9.57403e+07	4.88744e+06	0.0510489		6.86312e+07	1.25255e+06	0.0182505		1.00833e+08	1.42225e+06	0.0141049		5.58108e+07	2.50555e+06	0.0448937		1.56505e+08	1.43842e+07	0.0919093		1.23132e+08	7.57557e+06	0.0615239		1.87985e+08	5.34546e+06	0.0284355		2.08159e+08	9.20234e+06	0.0442081			0.052583	0.41457
4	p,m-Xylene	106-42-3	877	471	91	2.53824e+08	2.55093e+07	0.1005		2.2595e+08	1.195e+07	0.0528878		1.19571e+08	1.78498e+06	0.0149282		2.48856e+08	8.55982e+06	0.0343966		9.38152e+07	3.98721e+06	0.0425007		2.26808e+08	1.242e+07	0.05476		2.52523e+08	1.91472e+07	0.0758234		2.97255e+08	1.89694e+07	0.0638154		3.01516e+08	1.35433e+07	0.0449173			0.0538366	0.32111
5	o-Xylene	95-47-6	491	894	91	1.03016e+08	1.44661e+07	0.140426		9.34287e+07	7.25189e+06	0.0776195		5.43908e+07	500369	0.00919952		8.87961e+07	3.70654e+06	0.0417422		4.05926e+07	2.02598e+06	0.04991		9.25923e+07	5.02708e+06	0.0542926		1.01819e+08	7.13939e+06	0.0701187		119400000	8.03206e+06	0.0672702		1.27869e+08	6.14569e+06	0.0480625			0.0620712	0.307795
6	Trichloroethylene	79-01-6	250	701	130	1.14656e+08	1.91978e+07	0.167438		6.56039e+07	1.08271e+07	0.165037		9.22744e+07	3.65681e+07	0.396297		6.379e+07	2.10935e+06	0.0330672		3.29476e+07	4.00157e+06	0.121453		7.55417e+07	3.49118e+07	0.462153		6.05401e+07	1.09148e+07	0.18029		8.19193e+07	9.62859e+06	0.117538		1.12669e+08	2.8127e+07	0.249643			0.210324	0.33593
7	Tetrachloroethylene	127-18-4	394	815	166	1.89646e+06	368943	0.194543		1.08411e+06	144479	0.13327		2.18658e+06	77749.2	0.0355574		2.62399e+06	92038.5	0.0350757		1.66585e+06	28470.6	0.0170907		8.21496e+06	889651	0.108296		3.6877e+06	341341	0.092562		8.26321e+06	434015	0.0525238		3.10524e+06	487126	0.156872			0.0917546	0.748106
8	Furfural	98-01-1	422	835	95	9.13259e+07	6.03106e+06	0.0660389		1.12907e+08	8.93222e+06	0.0791112		7.80257e+07	3.45321e+06	0.0442573		2.192e+07	1.46934e+06	0.0670318		6.00294e+07	3.84125e+06	0.0639895		1.73688e+08	9.041e+06	0.0520531		6.3115e+07	4.72773e+06	0.0749066		1.38129e+08	1.02639e+07	0.0743066		1.73883e+08	7.75091e+06	0.0445755			0.062919	0.518132
9	alpha-Pinene	80-56-8	529	940	93	4.99034e+07	6.42402e+06	0.128729		3.42529e+07	3.97522e+06	0.116055		1.51383e+08	1.56938e+06	0.010367		3.16702e+07	3.02134e+06	0.0954002		3.89961e+07	3.36718e+06	0.0863467		4.75544e+07	6.76493e+06	0.142257		5.22421e+07	4.88118e+06	0.0934338		5.0877e+07	5.11083e+06	0.100455		4.19372e+07	6.26402e+06	0.149367			0.10249	0.662793
10	Sulcatone	110-93-0	570	986	108	1.80999e+06	116100	0.0641441		1.24613e+07	521547	0.0418532		4.63469e+06	861533	0.185888		262068	14478.1	0.0552454		1.87195e+06	111029	0.0593116		6.8887e+06	250318	0.0363375		1.86919e+06	68185	0.0364784		3.78987e+06	726958	0.191816		1.15334e+07	1.58811e+06	0.137696			0.0898634	0.880045
11	beta-Pinene	127-91-3	571	980	136	1.07868e+06	30991.4	0.0287307		1.05791e+06	49939.7	0.0472061		849688	40495.4	0.0476591		527965	32851.4	0.0622226		1.54663e+06	38539	0.024918		1.32835e+06	154636	0.116412		1.29863e+06	115171	0.0886866		1.56849e+06	153742	0.0980193		1.23175e+06	155988	0.126639			0.0711659	0.284862
12	3-Carene	13466-78-9	597	1009	93	6.20389e+07	1.10818e+06	0.0178627		7.65075e+07	5.46584e+06	0.0714418		1.16551e+08	8.42715e+06	0.0723045		7.63056e+06	961898	0.126059		2.53011e+07	1.92557e+06	0.0761061		8.55757e+07	3.01072e+06	0.035182		3.70188e+07	996361	0.026915		9.62497e+07	1.18946e+07	0.12358		1.13081e+08	1.11622e+07	0.0987099			0.0720179	0.56283
13	Limonene	138-86-3	613	1031	136	1.95812e+06	128716	0.0657345		5.79288e+06	639749	0.110437						671527	32224.8	0.0479874		2.37824e+06	41825.7	0.0175868		9.83745e+06	366209	0.037226		2.19841e+06	183560	0.0834966		1.27974e+07	1.68189e+06	0.131425		1.52898e+07	1.39673e+06	0.0913503			0.0731554	0.877707

## Sheet: 2.4.2_SpatVariability
Transect mapping. Data in Figure 6																						Figure 6
												Grid Layout										Minimum measured concentration in each grid cell
															NORTH
																		Control				Alpha-Pinene				NORTH
												EW 1	1	2	3	4	5												137.544
												EW 2	6	7	8	9	10						EW 1	73.6092	84.3869	265.594	93.3299	118.888
											WEST	EW 3	11	12	13	14	15	EAST					EW 2	73.6092	84.3869	410.836	93.3299	118.888
Volume sampled (L):	58.3											EW 4	16	17	18	19	20					WEST	EW 3	68.5668	68.5668	68.5668	68.5668	68.5668	EAST
Moles sampled:	2.39	(24.4 L/mol @ 0 oC, 0.92 bar)										EW 5	21	22	23	24	25						EW 4	18.5659	18.5659	18.5659	18.5659	18.5659
													NS 1	NS 2	NS 3	NS 4	NS 5						EW 5	14.6526	14.6526	14.6526	14.6526	14.6526
																								NS 1	NS 2	NS 3	NS 4	NS 5
															SOUTH
																										SOUTH
									Signal (arbitrary units)
Name	CAS#	MW (g/mol)	v.p. (Pa)	RI	RT (sec)	Quant ion	coordinate (x,y), m	Location (cell)	NS 1	NS 2	NS 3	NS 4	NS 5	EW 1	EW 2	EW 3	EW 4	EW 5	Control
Alpha-pinene	80-56-8	136.24	633	940	534	93	(7,11)	NE corner: 12	57370000	65770000	465200000	72740000	92660000	207000000	320200000	53440000	14470000	11420000	107200000
Decane	124-18-5	142.29	195	1000	589	57	(1,17);(6,6)	SW corner: 1; centered: 17	945300000	3948000000	339500000	92780000	74240000	1767000000	80060000	180500000	3014000000	19890000	49280000			Decane				NORTH
Adamantane	281-23-2	136.24	2.99	1117	667	136	(13,15)	NW corner: 9	464600	583000	1410000	20680000	3378000	6280000	303100	0	0	0	139300										42.6695
Isoborneol	124-76-5	154.25	0.057	1156	718	95	(14,8)	border: 14, 19	0	0	0	737000	1448000	348100	735600	2350000	0	0	0				EW 1	818.496	1529.97	293.959	80.3343	64.2813
Dodecane	112-40-3	170.34	18	1200	732	57	(4,8);(11,1)	corner: 11,12,16,17; SE corner:23	9369000	79370000	33280000	80570000	30100000	30750000	59290000	207500000	118700000	242700000	10820000				EW 2	69.3206	69.3206	69.3206	69.3206	64.2813
																						WEST	EW 3	156.287	156.287	156.287	80.3343	64.2813	EAST
									Calibrated (ppt); Calibration data below						ppt = signal/slope*1e-9/MW/moles air*1e12								EW 4	818.496	2609.7	293.959	80.3343	64.2813
Name	CAS#	MW (g/mol)	v.p. (Pa)	RI	RT (sec)	Quant ion	coordinate (x,y), m	Location (cell)	NS 1	NS 2	NS 3	NS 4	NS 5	EW 1	EW 2	EW 3	EW 4	EW 5	Control				EW 5	17.2219	17.2219	17.2219	17.2219	17.2219
Alpha-pinene	80-56-8	136.24	633	940	534	93	(7,11)	NE corner: 12	73.6092	84.3869	596.88	93.3299	118.888	265.594	410.836	68.5668	18.5659	14.6526	137.544					NS 1	NS 2	NS 3	NS 4	NS 5
Decane	124-18-5	142.29	195	1000	589	57	(1,17);(6,6)	SW corner: 1; centered: 17	818.496	3418.41	293.959	80.3343	64.2813	1529.97	69.3206	156.287	2609.7	17.2219	42.6695
Adamantane	281-23-2	136.24	2.99	1117	667	136	(13,15)	NW corner: 9	0.549601	0.689663	1.66797	24.4635	3.99602	7.42896	0.358554	0	0	0	0.164786							SOUTH
Isoborneol	124-76-5	154.25	0.057	1156	718	95	(14,8)	border: 14, 19	0	0	0	1.20133	2.36028	0.567412	1.19905	3.83056	0	0	0
Dodecane	112-40-3	170.34	18	1200	732	57	(4,8);(11,1)	border: 11,12,16,17; SE corner:23	6.27271	53.1396	22.2815	53.943	20.1525	20.5877	39.6957	138.925	79.4717	162.492	7.24417
																						Adamantane				NORTH
									CALIBRATION DATA																				0.164786
										Alpha-pinene		Decane		Adamantane		Isoborneol		Dodecane					EW 1	0.549601	0.689663	1.66797	7.42896	3.99602
									Std	ng	signal	ng	signal	ng	signal	ng	signal	ng	signal				EW 2	0.358554	0.358554	0.358554	0.358554	0.358554
									A	14.42	33760000	12.26	43170000	12.14	35130000	14.65	15450000	12.59	46660000			WEST	EW 3	0	0	0	0	0	EAST
									B	28.83	97530000	24.53	90330000	24.29	86560000	29.3	57480000	25.18	104700000				EW 4	0	0	0	0	0
									C	57.66	129800000	49.06	175900000	48.58	108300000	58.61	77940000	50.36	184600000				EW 5	0	0	0	0	0
									D	115.32	273100000	98.11	326600000	97.15	254800000	117.22	203800000	100.73	366500000					NS 1	NS 2	NS 3	NS 4	NS 5
									Slope (signal/ng)	2.39359e+06		3.3961e+06		2.59615e+06		1.66411e+06		3.6688e+06								SOUTH
																						Isoborneol				NORTH
																													0
																							EW 1	0	0	0	0.567412	0.567412
																							EW 2	0	0	0	1.19905	1.19905
																						WEST	EW 3	0	0	0	1.20133	2.36028	EAST
																							EW 4	0	0	0	0	0
																							EW 5	0	0	0	0	0
																								NS 1	NS 2	NS 3	NS 4	NS 5
																										SOUTH
																						Dodecane				NORTH
																													7.24417
																							EW 1	6.27271	20.5877	20.5877	20.5877	20.1525
																							EW 2	6.27271	39.6957	22.2815	39.6957	20.1525
																						WEST	EW 3	6.27271	53.1396	22.2815	53.943	20.1525	EAST
																							EW 4	6.27271	53.1396	22.2815	53.943	20.1525
																							EW 5	6.27271	53.1396	22.2815	53.943	20.1525
																								NS 1	NS 2	NS 3	NS 4	NS 5
																										SOUTH
